# Supplementary material
Source: publisher site journal article supplement (https://www.dovepress.com/article/410057)
Supplement: Supplementary file 1 [file get_supplementary_file.php]

**Supplementary Figures**

**Supplementary Figure 1**


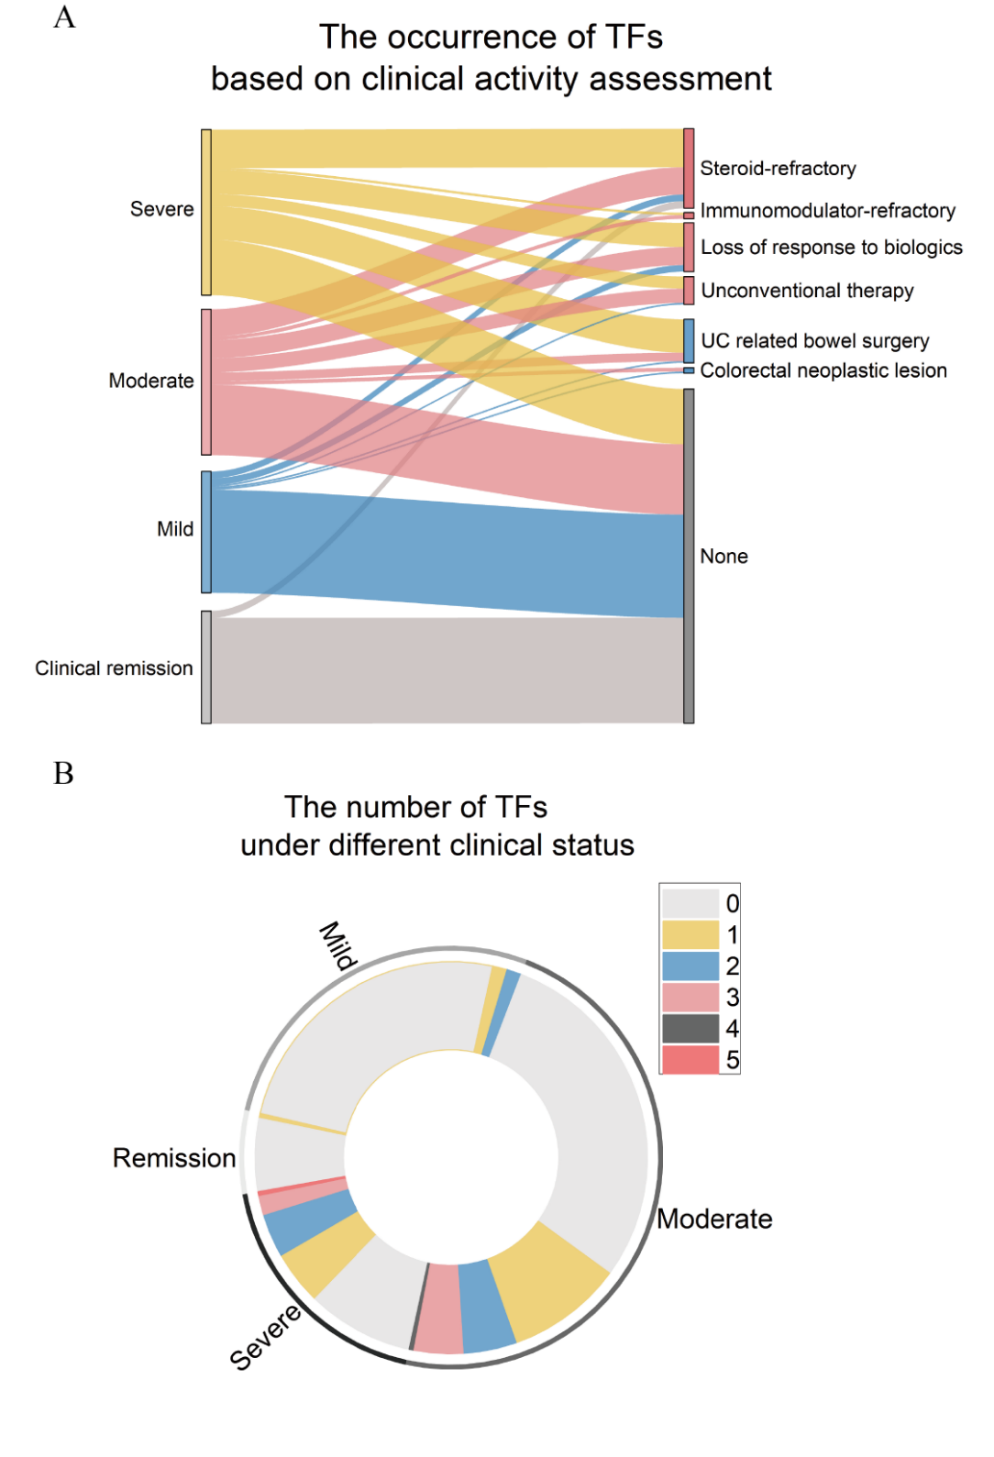


Supplementary Figure 1. Treatment failures (TFs) with different levels of clinical activity

**Notes**: (A) Occurrence of TFs based on clinical activity assessment. (B) Number of TFs under different clinical status.

**Abbreviations**: UC, ulcerative colitis; TFs, treatment failures.

**Supplementary Figure 2**


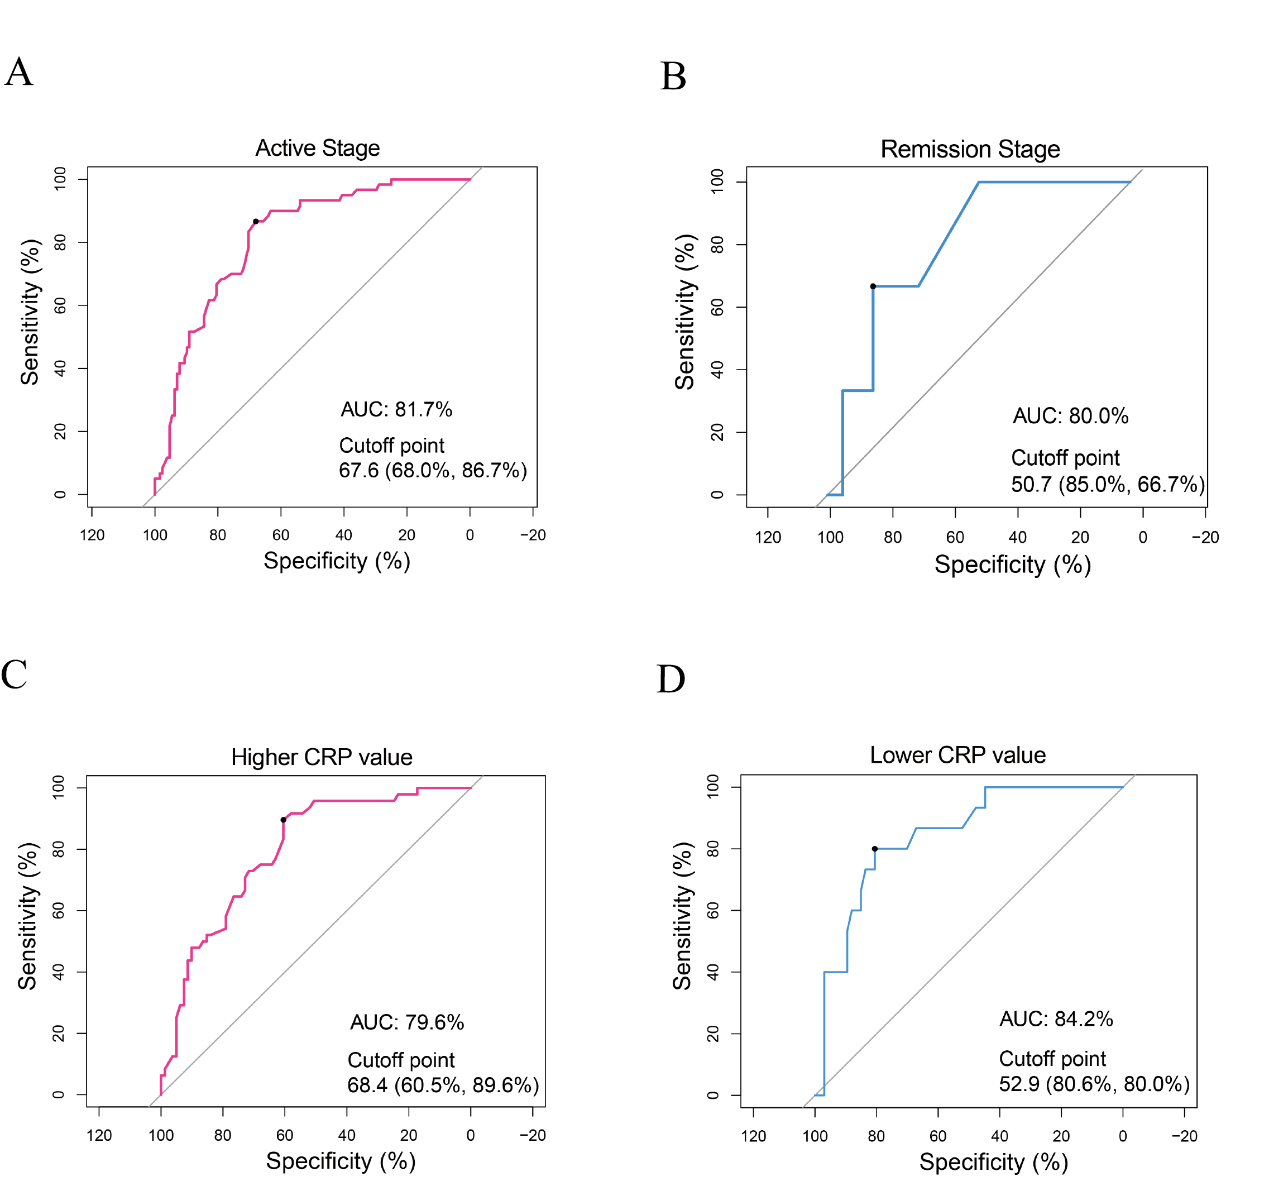


Supplementary Figure 2. ROC curve with different levels of disease course based on Mayo score and CRP level

**Notes**: The discrimination performance in the subgroup of (A) active stage, (B) remission stage, (C) patients with higher CRP value, and (B) patients with lower CRP value.

**Abbreviations**: ROC, Receiver operating characteristic; AUC, area under curve; CRP, C-reactive protein.

**Supplementary Figure 3**


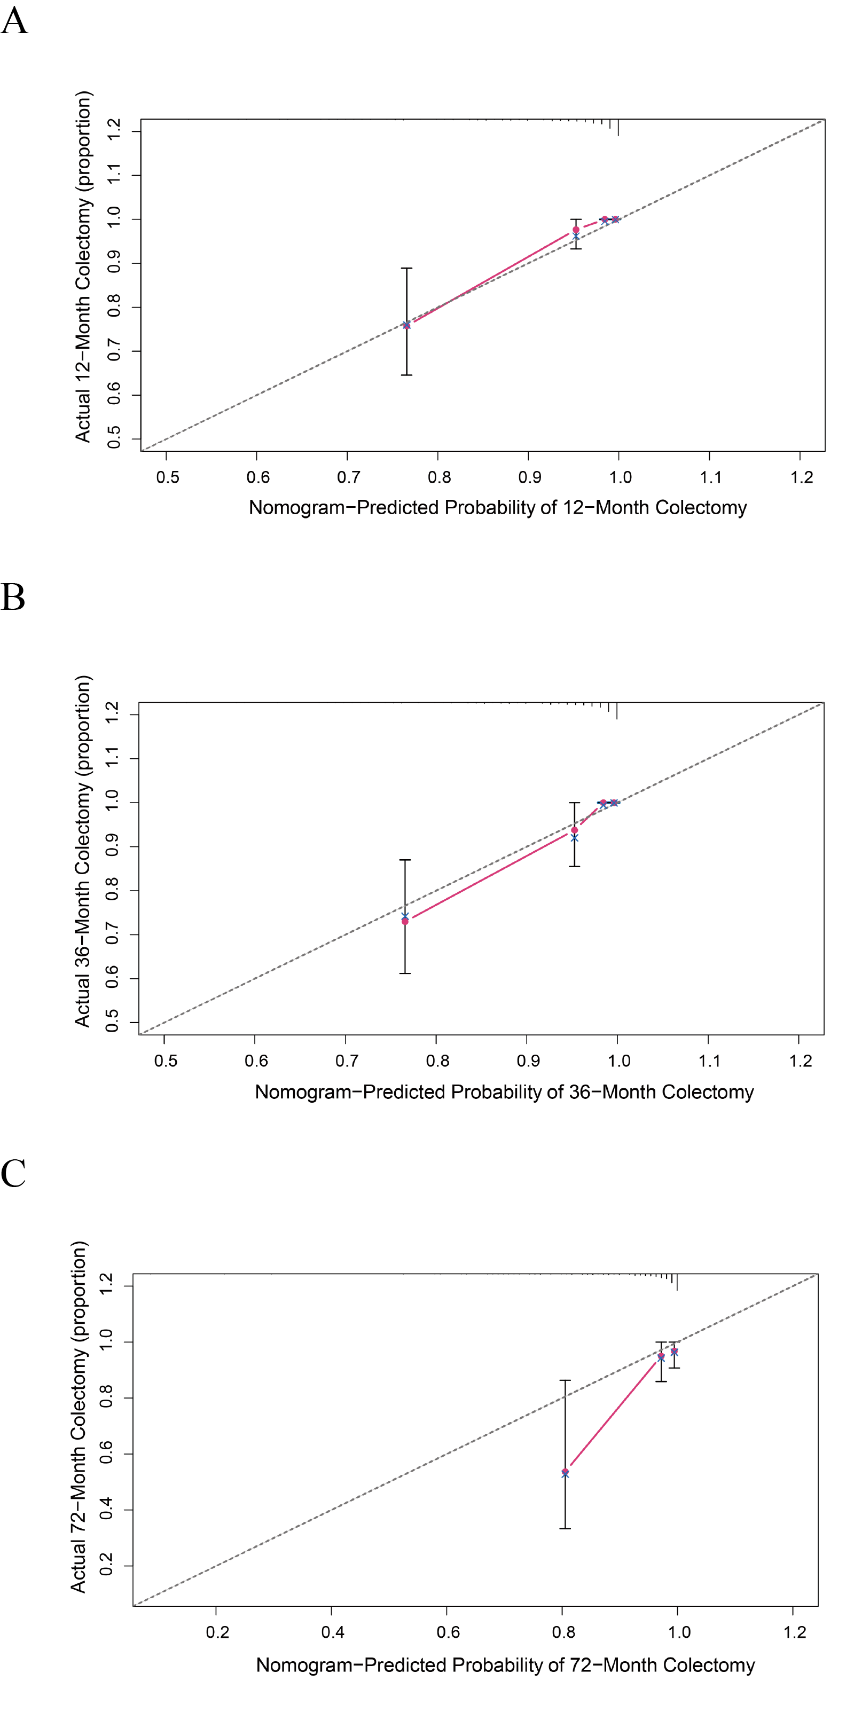


Supplementary Figure 3. Calibration curve estimating the consistency between predictive probability and actual proportions of colectomy incidence at (A)12 months (B) 36 months and (C) 72 months.

Supplementary Table 1. Logistic regression analysis of response to biologic therapy

in ulcerative colitis patients

| **Variable** | | **Univariate analysis** | | **Multivariate analysis** | | |
| --- | --- | --- | --- | --- | --- | --- |
|  | | **OR (95%CI)** | ***p* value** | **OR (95%CI)** | ***p* value** | |
| **Colonic mucus assessment** | | |  |  | |  |
| GCs area | 0.039(0.000-3.838) | | .173 |  | |  |
| MUC2 intensity | 1.292(0.465-3.561) | | .619 |  | |  |
| SLC26A3 intensity | 3.429(1.279-10.064) | | .018 | 3.446(1.200-10.934) | | .026 |
| **Baseline characteristics** | | |  |  | |  |
| Age at diagnosis | 3.246(1.222-9.066) | | .020 | 2.173(0.710-6.737) | | .172 |
| Disease duration | 2.833(1.119-7.422) | | .030 | 2.714(0.930-8.246) | | .070 |
| **Laboratory values** |  | |  |  | |  |
| CRP | 0.709(0.280-1.756) | | .461 |  | |  |
| Hb | 0.979(0.336-2.765 | | .968 |  | |  |
| PLT | 0.802(0.311-2.077) | | .647 |  | |  |
| Fecal  calprotectin | 0.150(0.007-1.146) | | .108 |  | |  |
| pANCA (positive) | 1.105(0.388-3.197) | | .852 |  | |  |
| **Clinical activity index** | | |  |  | |  |
| Truelove score | 0.442(0.151-1.196) | | .119 |  | |  |
| UCEIS score | 0.512(0.189-1.315) | | .172 |  | |  |
| Mayo score | 0.846(0.704-0.998) | | .057 |  | |  |
|  | | | | | | |

**Notes**: p<0.05, difference was statistically significant.

**Abbreviations**: Hb, Haemoglobin; PLT, Thrombocyte; OR, odds ratio; CI, confidence interval.

Supplementary Table 2. Cox regression analysis of predictive value about colectomy based on baseline variables in ulcerative colitis patients

| **Variable** | **Univariate analysis** | | **Multivariate analysis** | |  |
| --- | --- | --- | --- | --- | --- |
|  | **HR (95% CI)** | ***p* value** | **HR (95% CI)** | ***p* value** |  |
| **Colonic mucus assessment** | | | | |  |
| GC area | 0.443 (0.187–1.047) | 0.064 |  |  |  |
| MUC2 intensity | 0.301 (0.126–0.716) | 0.007 | 0.387 (0.156–0.959) | 0.04 |  |
| **Baseline characteristics** | | | | |  |
| Age at onset | 1.067 (1.036–1.100) | 0.000 | 1.068 (1.035–1.102) | 0.000 |  |
| **Laboratory values** | | | | | |
| WBC | 0.961 (0.844–1.096) | 0.557 |  |  |  |
| Fecal calprotectin | 1.001 (0.998–1.004) | 0.484 |  |  |  |
| pANCA positive | 0.550 (0.206–1.471) | 0.234 |  |  |  |
| **Clinical activity index** | | | | | |
| Truelove score | 3.122 (1.746–5.581) | 0.000 |  |  |  |
| UCEIS score | 1.933 (1.425–2.623) | 0.000 |  |  |  |
| Mayo score | 1.571 (1.280–1.928) | 0.000 | 1.442 (1.176–1.768) | 0.000 |  |

**Notes**: *p*<0.05 denotes that the difference was statistically significant.

**Abbreviations**: WBC, white blood cell count; HR, hazard ratios; CI, confidence interval.
